# Supplementary material for: Te3O3(PO4)2: a phosphate crystal with large birefringence activated by the highly distorted [TeO5] group and antiparallel [PO4] pseudo-layer
Source: Royal Society of Chemistry journal article supplement (doi:10.1039/d0tc02311f), 2020-01-01
Supplement: d0tc02311f1.pdf [file d0tc02311f1.pdf]

## Supporting Information

# **Te<sub>3</sub>O<sub>3</sub>(PO<sub>4</sub>)<sub>2</sub>: a Phosphate Crystal With Large Birefringence Activated by Highly Distorted [TeO<sub>5</sub>] Group and Antiparallel [PO<sub>4</sub>] Pseudo-layer**

Weimin Dong,<sup>†</sup> Yingjie Sun,<sup>‡</sup> Qian Yao,<sup>†</sup> Lintao Liu,<sup>†</sup> Qingbo Wang,<sup>†</sup> Hang Wen,<sup>†</sup> Jing Li,<sup>\*,†</sup> Xinguang Xu,<sup>†</sup> and Jiyang Wang<sup>†</sup>

<sup>†</sup>State Key Laboratory of Crystal Materials, Shandong University, Jinan 250100, P. R. China

<sup>‡</sup>School of Materials Science and Engineering, Yunnan University, Kunming 650091, P. R. China

## CONTENTS

**Fig. S1.** As-growth Te<sub>3</sub>O<sub>3</sub>(PO<sub>4</sub>)<sub>2</sub> crystals by the Czochralski method and flux method.

**Fig. S2.** Antiparallel [PO<sub>4</sub>] pseudo-layer structure in YPO<sub>4</sub>, BaSn<sub>2</sub>(PO<sub>4</sub>)<sub>2</sub>, Te<sub>2</sub>O(PO<sub>4</sub>)<sub>2</sub>, and Pb<sub>2</sub>(IO<sub>3</sub>)(PO<sub>4</sub>).

**Table S1.** Crystallographic parameters and details of the structure refinement for Te<sub>3</sub>O<sub>3</sub>(PO<sub>4</sub>)<sub>2</sub>.

**Table S2.** Selected bond angles (deg.) in Te<sub>3</sub>O<sub>3</sub>(PO<sub>4</sub>)<sub>2</sub>.

**Table S3.** Bond length (Å) and Mulliken bond population in Te<sub>3</sub>O<sub>3</sub>(PO<sub>4</sub>)<sub>2</sub>.

**Table S4.** The UV and IR cutoff edge for the reported inorganic phosphate crystals.

**Table S5.** The comparison of birefringence at 1064 nm among the known inorganic phosphate crystals.

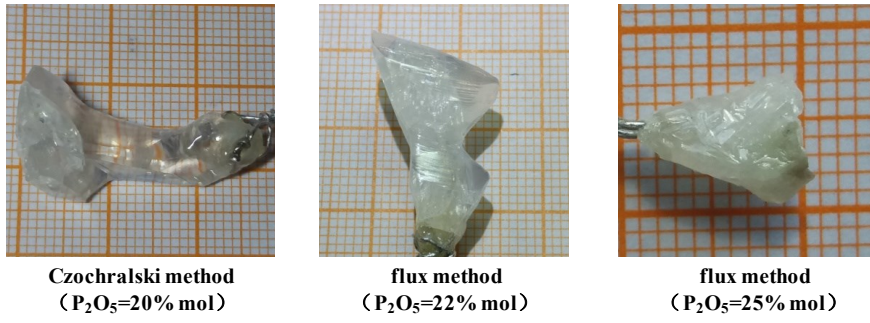

Fig. S1. As-growth  $Te_3O_3(PO_4)_2$  crystals by the Czochralski method and flux method.

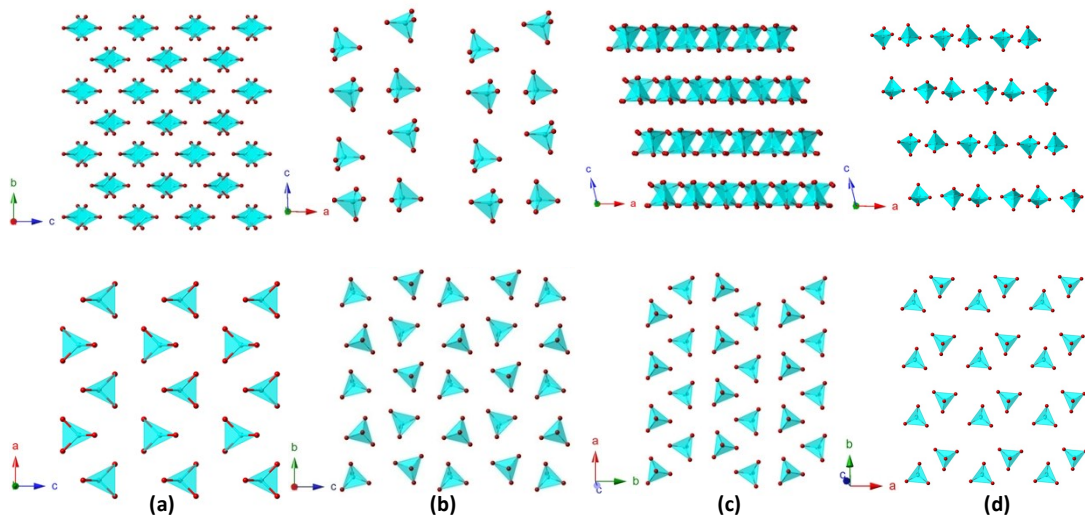

Fig. S2. Antiparallel  $[PO_4]$  pseudo-layer structure in (a)  $YPO_4$ , (b)  $BaSn_2(PO_4)_2$ , (c)  $Te_2O(PO_4)_2$ , and  $Pb_2(IO_3)(PO_4)$ .

**Table S1.** Crystallographic parameters and details of the structure refinement for  $\text{Te}_3\text{O}_3(\text{PO}_4)_2$ .

|                                         |                                        |
|-----------------------------------------|----------------------------------------|
| Empirical formula                       | $\text{Te}_3\text{O}_3(\text{PO}_4)_2$ |
| Formula mass                            | 620.74                                 |
| Temperature/K                           | 273(2)                                 |
| Wavelength/nm                           | 0.71073                                |
| color, habit                            | colorless block                        |
| Crystal system                          | Monoclinic                             |
| space group                             | $P2_1/c$                               |
| a/Å                                     | 12.371(8)                              |
| b/Å                                     | 7.325(5)                               |
| c/Å                                     | 9.836(6)                               |
| $\beta/^\circ$                          | 98.002(7)                              |
| Volume/Å <sup>3</sup>                   | 882.6(10)                              |
| Z                                       | 4                                      |
| density/g/cm <sup>3</sup>               | 4.671                                  |
| Absorption coefficient/mm <sup>-1</sup> | 10.268                                 |
| F(000)                                  | 1906                                   |
| Crystal size/mm <sup>3</sup>            | 0.21×0.20×0.20                         |
| GOF on F <sup>2</sup>                   | 1.035                                  |
| Final R indices [ $I > 2\sigma(I)$ ]    | $R_1=0.0412$ , $wR_2=0.1324$           |
| R indices (all data)                    | $R_1=0.0505$ , $wR_2=0.1464$           |
| Extinction coefficient                  | 0.0026(4)                              |

**Table S2.** Selected bond angles (deg.) in  $\text{Te}_3\text{O}_3(\text{PO}_4)_2$ .

| bonds      | bond angles | bonds       | bond angles |
|------------|-------------|-------------|-------------|
| O2-P1-O4   | 112.99(2)   | O6-Te1-O2   | 84.46(2)    |
| O2-P1-O3   | 107.01(9)   | O11-Te2-O10 | 94.58(7)    |
| O2-P1-O1   | 110.88(7)   | O11-Te2-O5  | 89.36(8)    |
| O4-P1-O3   | 111.50(3)   | O11-Te2-O8  | 80.19(2)    |
| O4-P1-O1   | 106.49(9)   | O11-Te2-O6  | 84.20(4)    |
| O3-P1-O1   | 107.87(0)   | O10-Te2-O5  | 79.73(1)    |
| O8-P2-O7   | 110.99(0)   | O10-Te2-O8  | 81.45(7)    |
| O8-P2-O9   | 112.65(9)   | O10-Te2-O6  | 146.28(9)   |
| O8-P2-O10  | 106.58(8)   | O5-Te2-O8   | 157.64(6)   |
| O7-P2-O9   | 110.18(0)   | O5-Te2-O6   | 66.58(2)    |
| O7-P2-O10  | 111.71(4)   | O8-Te2-O6   | 130.96(5)   |
| O9-P2-O10  | 104.50(4)   | O6-Te3-O1   | 83.12(6)    |
| O5-Te1-O11 | 88.26(0)    | O6-Te3-O3   | 85.40(6)    |
| O5-Te1-O4  | 78.19(5)    | O6-Te3-O7   | 83.92(7)    |
| O5-Te1-O6  | 76.68(9)    | O6-Te3-O9   | 78.87(7)    |
| O5-Te1-O2  | 84.03(8)    | O1-Te3-O3   | 82.21(9)    |
| O11-Te1-O4 | 91.51(9)    | O1-Te3-O7   | 92.74(9)    |
| O11-Te1-O6 | 88.4708     | O1-Te3-O9   | 161.85(7)   |

|            |           |           |           |
|------------|-----------|-----------|-----------|
| O11-Te1-O2 | 170.56(3) | O3-Te3-O7 | 168.68(3) |
| O4-Te1-O6  | 154.87(3) | O3-Te3-O9 | 94.00(0)  |
| O4-Te1-O2  | 92.2319   | O7-Te3-O9 | 87.64(5)  |

**Table S3.** Bond length (Å) and Mulliken bond population in  $\text{Te}_3\text{O}_3(\text{PO}_4)_2$ .

| bonds   | length   | population | bonds  | length    | population |
|---------|----------|------------|--------|-----------|------------|
| Te1-O2  | 2.196(7) | 0.13       | Te3-O6 | 1.889(7)  | 0.32       |
| Te1-O4  | 2.086(1) | 0.11       | Te3-O7 | 2.145 (6) | 0.16       |
| Te1-O5  | 1.908(1) | 0.40       | Te3-O9 | 2.149(3)  | 0.14       |
| Te1-O6  | 2.088(5) | 0.23       | P1-O1  | 1.556(2)  | 0.56       |
| Te1-O11 | 1.980(9) | 0.17       | P1-O2  | 1.519(4)  | 0.66       |
| Te2-O5  | 1.976(6) | 0.24       | P1-O3  | 1.525(0)  | 0.61       |
| Te2-O6  | 2.482(0) | 0.04       | P1-O4  | 1.521(1)  | 0.61       |
| Te2-O8  | 2.284(6) | 0.09       | P2-O7  | 1.527(4)  | 0.62       |
| Te2-O10 | 1.965(9) | 0.22       | P2-O8  | 1.513(5)  | 0.70       |
| Te2-O11 | 1.825(7) | 0.45       | P2-O9  | 1.542(3)  | 0.60       |
| Te3-O1  | 2.091(1) | 0.17       | P2-O10 | 1.570(3)  | 0.51       |
| Te3-O3  | 2.125(7) | 0.16       |        |           |            |

**Table S4.** The UV and IR cutoff edge for the reported inorganic phosphate crystals.

| compounds                                                                                 | UV cutoff edge (nm) | IR cutoff edge (nm) |
|-------------------------------------------------------------------------------------------|---------------------|---------------------|
| KDP <sup>1</sup>                                                                          | 175                 | 1500                |
| ADP <sup>2</sup>                                                                          | 190                 | 1500                |
| DKDP <sup>1</sup>                                                                         | 175                 | 1800                |
| CsLa(PO <sub>3</sub> ) <sub>4</sub> <sup>3</sup>                                          | 167                 | 4000                |
| KLa(PO <sub>3</sub> ) <sub>4</sub> <sup>4</sup>                                           | 162                 | 4000                |
| KGd(PO <sub>3</sub> ) <sub>4</sub> <sup>5</sup>                                           | 180                 | 4000                |
| K <sub>4</sub> Mg <sub>4</sub> (P <sub>2</sub> O <sub>7</sub> ) <sub>3</sub> <sup>6</sup> | 170                 | 4210                |
| BPO <sub>4</sub> <sup>7</sup>                                                             | 134                 | 4230                |
| Ga <sub>3</sub> PO <sub>7</sub> <sup>8</sup>                                              | 250                 | 4300                |
| LiFeP <sub>2</sub> O <sub>7</sub> <sup>9</sup>                                            | 480                 | 4300                |
| RTP <sup>10</sup>                                                                         | 350                 | 4500                |
| KTP <sup>10</sup>                                                                         | 350                 | 4500                |
| YSr <sub>3</sub> (PO <sub>4</sub> ) <sub>3</sub> <sup>11</sup>                            | 190                 | 4500                |
| YBa <sub>3</sub> (PO <sub>4</sub> ) <sub>3</sub> <sup>11</sup>                            | 190                 | 4500                |
| Te <sub>2</sub> O(PO <sub>4</sub> ) <sub>2</sub> <sup>12</sup>                            | 290                 | 4700                |
| Te <sub>3</sub> O <sub>3</sub> (PO <sub>4</sub> ) <sub>2</sub>                            | 290                 | 4760                |

**Table S5.** Birefringence at 1064 nm of  $\text{Te}_3\text{O}_3(\text{PO}_4)_2$  and some known phosphate crystals.

| compound                                            | birefringence | refs.     |
|-----------------------------------------------------|---------------|-----------|
| $\text{RbNaMgP}_2\text{O}_7$                        | 0.0034        | 13        |
| $\text{BPO}_4$                                      | 0.005         | 7         |
| $\text{K}_4\text{Mg}_4(\text{P}_2\text{O}_7)_3$     | 0.007         | 6         |
| $\text{LiCs}_2\text{PO}_4$                          | 0.008         | 14        |
| $\text{KLa}(\text{PO}_3)_4$                         | 0.0084        | 4         |
| $\text{Ba}_5\text{P}_6\text{O}_{20}$                | 0.009         | 14        |
| $\text{RbPb}_4(\text{PO}_4)_3$                      | 0.014         | 15        |
| $\text{LiPbPO}_4$                                   | 0.021         | 16        |
| $\text{KPb}_2(\text{PO}_3)_5$                       | 0.021         | 17        |
| $\text{Ba}_3\text{P}_3\text{O}_{10}\text{Cl}$       | 0.028         | 6         |
| KDP                                                 | 0.034         | 18        |
| $\text{Ba}_3(\text{ZnB}_5\text{O}_{10})\text{PO}_4$ | 0.040         | 19        |
| $\text{Pb}_3\text{Mg}_3\text{TeP}_2\text{O}_{14}$   | 0.050         | 20        |
| $\text{Pb}_2(\text{IO}_3)(\text{PO}_4)$             | 0.060         | 21        |
| $\text{LiHgPO}_4$                                   | 0.068         | 16        |
| $\text{BaSn}_2(\text{PO}_4)_2$                      | 0.071         | 14        |
| KTP                                                 | 0.09          | 22        |
| $\text{YPO}_4$                                      | 0.101         | 23        |
| $\text{Te}_2\text{O}(\text{PO}_4)_2$                | 0.103         | 12        |
| $\text{ScPO}_4$                                     | 0.112         | 23        |
| $\text{Te}_3\text{O}_3(\text{PO}_4)_2$              | 0.148         | this work |

## References

1. A. Dyan, G. Duchateau, S. Eslava, J. Stehle, D. Damiani and H. Piombini, *J. Mod. Opt.*, 2009, **56**, 27-31.
2. Z. Li, X. Huang, D. Wu and K. Xiong, *J. Cryst. Growth*, 2001, **222**, 524-527.
3. T. Sun, P. Shan, H. Chen, X. Liu, H. Liu, S. Chen, Y. a. Cao, Y. Kong and J. Xu, *CrystEngComm*, 2014, **16**, 10497-10504.
4. P. Shan, T. Sun, H. Chen, H. Liu, S. Chen, X. Liu, Y. Kong and J. Xu, *J. Sci. Rep.*, 2016, **6**, 25201.
5. I. Parreu, J. Carvajal, X. Solans, F. Díaz and M. Aguiló, *Chem. Mater.*, 2006, **18**, 221-228.
6. H. Yu, J. Young, H. Wu, W. Zhang, J. M. Rondinelli and P. S. Halasyamani, *Chem. Mater.*, 2017, **29**, 1845-1855.
7. X. Zhang, L. Wang, S. Zhang, G. Wang, S. Zhao, Y. Zhu, Y. Wu and C. Chen, *J. Opt. Soc. Am. B-Opt. Phys.*, 2011, **28**, 2236-2239.
8. G. Xu, J. Li, J. Wang, H. Zhao and Y. Yu, *J. Cryst. Growth*, 2009, **311**, 3163-3166.
9. W. Zhang and P. S. Halasyamani, *Cryst. Growth Des.*, 2012, **12**, 2127-2132.
10. G. Hansson, H. Karlsson, S. Wang and F. Laurell, *Appl. Opt.*, 2000, **39**, 5058-5069.
11. G. Wu, M. Fan, C. Jiang, F. Chen, F. Yu, X. Cheng and X. Zhao, *Cryst. Growth Des.*, 2020, **20**, 4601-4607.
12. W. Dong, Q. Yao, J. Zhang, L. Liu, J. Li and J. Wang, *Cryst. Growth Des.*, 2018, **18**, 5919-5926.
13. S. Zhao, X. Yang, Y. Yang, X. Kuang, F. Lu, P. Shan, Z. Sun, Z. Lin, M. Hong and J. Luo, *J. Am. Chem. Soc.*, 2018, **140**, 1592-1595.
14. Y. Yang, Y. Qiu, P. Gong, L. Kang, G. Song, X. Liu, J. Sun and Z. Lin, *Chem. Eur. J.*, 2019, **25**,

5648-5651.

15. M. Abudourehman, S. Han, X. Dong, B.-H. Lei, Y. Wang, Z. Yang, X. Long and S. Pan, *J. Alloys Compd.*, 2017, **690**, 330-336.
16. B. L. Wu, C. L. Hu, F. F. Mao, R. L. Tang and J. G. Mao, *J. Am. Chem. Soc.*, 2019, **141**, 10188-10192.
17. M. Abudourehman, S. Han, B.-H. Lei, Z. Yang, X. Long and S. Pan, *J. Mater. Chem. C*, 2016, **4**, 10630-10637.
18. Z. Lin, Z. Wang, C. Chen and M.-H. Lee, *J. Chem. Phys.*, 2003, **118**, 2349-2356.
19. H. Yu, W. Zhang, J. Young, J. M. Rondinelli and P. S. Halasyamani, *Adv. Mater.*, 2015, **27**, 7380-7385.
20. H. Yu, W. Zhang, J. Young, J. M. Rondinelli and P. S. Halasyamani, *J. Am. Chem. Soc.*, 2016, **138**, 88-91.
21. X. H. Zhang, B. P. Yang, J. Chen, C. L. Hu, Z. Fang, Z. Wang and J. G. Mao, *Chem. Commun.*, 2020, **56**, 635-638.
22. F. Zumsteg, J. Bierlein and T. Gier, *J. Appl. Phys.*, 1976, **47**, 4980-4985.
23. B. H. Lei, Z. Yang, H. Yu, C. Cao, Z. Li, C. Hu, K. R. Poeppelmeier and S. Pan, *J. Am. Chem. Soc.*, 2018, **140**, 10726-10733.
